# Supplementary material for: Protective effect of Pediococcus pentosaceus Li05 on diarrhea-predominant irritable bowel syndrome in rats
Source: Royal Society of Chemistry journal article supplement (doi:10.1039/d3fo04904c), 2024-01-01
Supplement: d3fo04904c1.pdf [file d3fo04904c1.pdf]

## Supplementary materials and methods

### 1. The calculation formulas for diarrhea indicators

Water content of the feces (%) = (wet weight - dry weight) / wet weight × 100%.

Diarrhea rate (%) = number of rats with loose stool in each group / total number of rats in each group × 100%.

Diarrhea index = loose stool rate × average fecal consistency.

Loose stool rate = number of loose stools per rat / total number of stools

### 2. Scoring criteria for abdominal withdrawal reflex (AWR)

| Score | Behavioral performance                                     |
|-------|------------------------------------------------------------|
| 0     | No behavioral response to abdominal distention             |
| 1     | Brief head movement                                        |
| 2     | Abdominal muscle contraction without elevating the abdomen |
| 3     | Elevation of the abdomen                                   |
| 4     | Lifting of the pelvic structure and arching of the body    |

Table S1 Primer pairs for real-time quantitative PCR analysis

| Gene    | Forward Primer (5'-3')   | Reverse Primer (5'-3')   |
|---------|--------------------------|--------------------------|
| β-actin | GCAGGAGTACGATGAGTCCG     | ACGCAGCTCAGTAACAGTCC     |
| IL-6    | AAGCCAGAGTCATTCAGAGC     | GTCCTTAGCCACTCCTTCTG     |
| IL-7    | TGAACTGCACAAGCAAGGAA     | TACTGCTGTTCAAGATTTTATTCC |
|         |                          | A                        |
| IL-18   | GAAACCCGCCTGTGTTTCGAG    | ATAGGGTCACAGCCAGTCCT     |
| GRO/KC  | CACTGCACCCAAACCGAAGT     | TTGGGGACACCCTTTAGCATC    |
| RANTES  | CCTACCTCTCCCTCGCACTG     | CTTGGCGGTTCCCTCGAGTG     |
| 5-HT3AR | AGAAGTGAGGTCGGACAAGAGCAT | TGAGGAAGATACTGGGCAGCAAG  |
| 5-HT3BR | AGGTCTTTTCTGAATGACAGCGAG | CAATGGACATCTGCGAATCACTA  |
|         |                          | C                        |

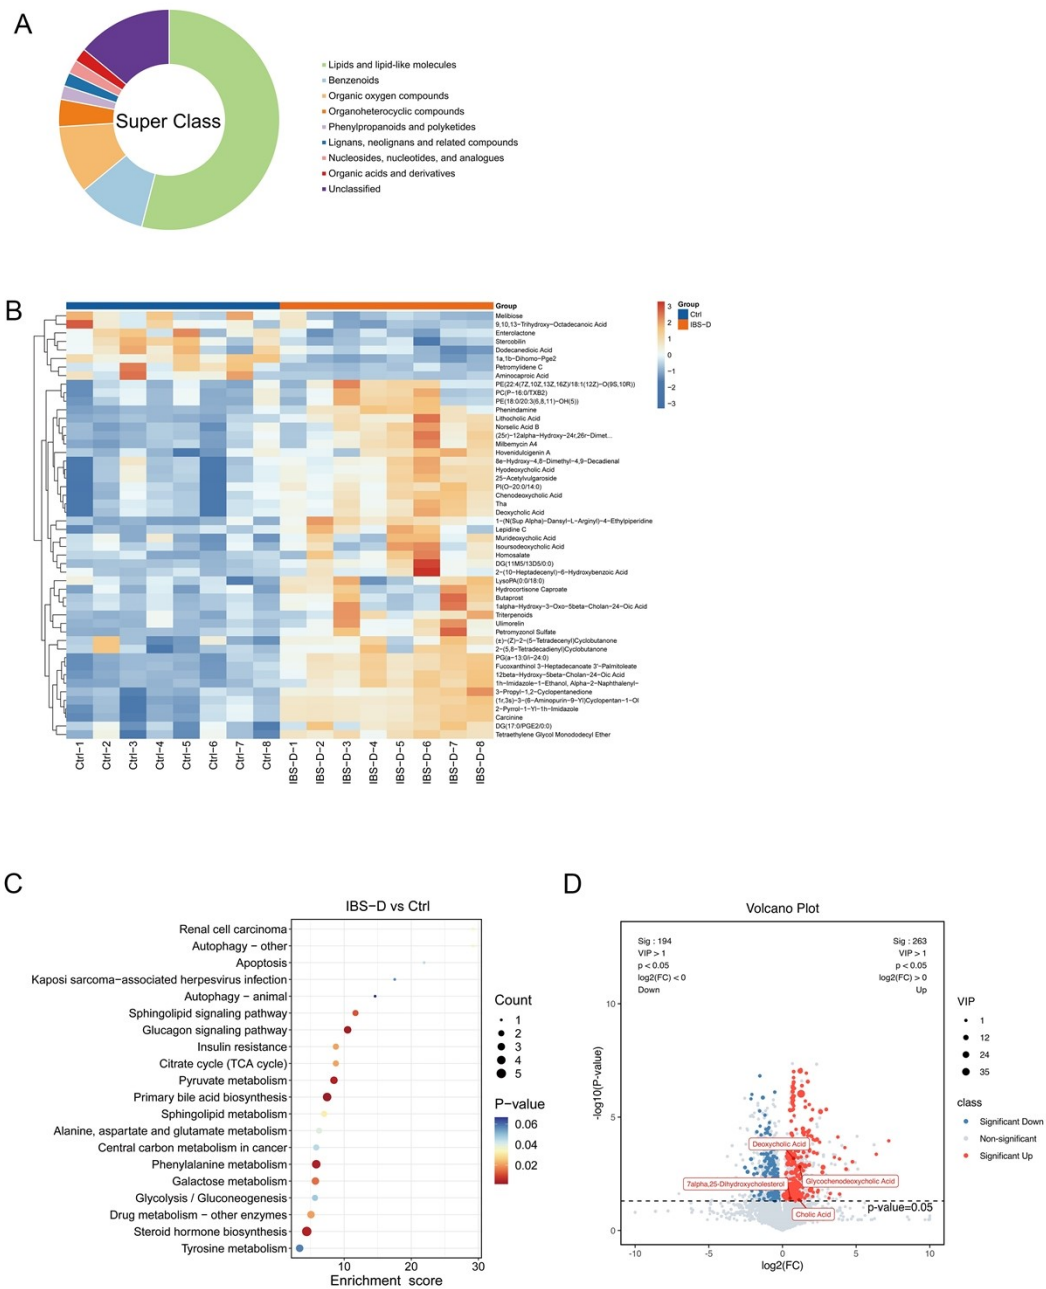

**Figure S1.** Changes in the metabolome of colon contents between the Ctrl and IBS-D groups. **(A)** Super class classification of the top 50 most importantly altered metabolites. **(B)** Heatmap displaying hierarchical clustering of the top 50 most significantly altered metabolites between the Ctrl group and IBS-D group. **(C)** The top 20 most significant pathways identified from KEGG pathway analysis of the significantly altered metabolites between the Ctrl group and IBS-D group. **(D)** Differential metabolites between the Ctrl group and IBS-D group.
